## RESEARCH ARTICLE

# Genomic characterization of foodborne *Salmonella enterica* and *Escherichia coli* isolates from Saboba district and Bolgatanga Municipality Ghana

Gabriel Temitope Sunmonu<sup>1</sup>, Frederick Adzitey<sup>2</sup>, Erkison Ewomazino Odih<sup>1</sup>, Boniface Awini Tibile<sup>2</sup>, Rejoice Ekli<sup>2</sup>, Martin Aduah<sup>2</sup>, Anderson O. Oaikhena<sup>1</sup>, Olabisi C. Akinlabi<sup>1</sup>, Akebe Luther King Abia<sup>3</sup>, Daniel Gyamfi Amoako<sup>3,4</sup>, Iruka N. Okeke<sup>1\*</sup>

**1** Department of Pharmaceutical Microbiology, Faculty of Pharmacy, University of Ibadan, Ibadan, Nigeria, **2** Faculty of Agriculture, Food and Consumer Sciences, University for Development Studies, Tamale, Ghana, **3** Antimicrobial Research Unit, College of Health Sciences, University of KwaZulu-Natal, Durban, South Africa, **4** Department of Integrative Biology and Bioinformatics, University of Guelph, Guelph, Ontario, Canada

\* [iruka.n.okeke@gmail.com](mailto:iruka.n.okeke@gmail.com)

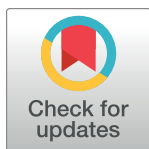

## OPEN ACCESS

**Citation:** Sunmonu GT, Adzitey F, Odih EE, Tibile BA, Ekli R, Aduah M, et al. (2025) Genomic characterization of foodborne *Salmonella enterica* and *Escherichia coli* isolates from Saboba district and Bolgatanga Municipality Ghana. PLoS ONE 20(2): e0315583. <https://doi.org/10.1371/journal.pone.0315583>

**Editor:** Mabel Kamweli Aworh, North Carolina State University, UNITED STATES OF AMERICA

**Received:** September 11, 2024

**Accepted:** November 28, 2024

**Published:** February 7, 2025

**Peer Review History:** PLOS recognizes the benefits of transparency in the peer review process; therefore, we enable the publication of all of the content of peer review and author responses alongside final, published articles. The editorial history of this article is available here: <https://doi.org/10.1371/journal.pone.0315583>

**Copyright:** © 2025 Sunmonu et al. This is an open access article distributed under the terms of the [Creative Commons Attribution License](https://creativecommons.org/licenses/by/4.0/), which permits unrestricted use, distribution, and reproduction in any medium, provided the original author and source are credited.

**Data Availability Statement:** The sequence reads were deposited in the European Nucleotide Archive with the study accession PRJEB58695 (For ease of

## Abstract

*Salmonella enterica* and *Escherichia coli* are well-known bacteria commonly associated with foodborne illnesses in humans and animals. Genomic characterization of these pathogens provides valuable insights into their evolution, virulence factors and resistance determinants. This study aimed to characterize previously isolated *Salmonella* (n = 14) and *E. coli* (n = 19) from milk, meat and its associated utensils in Ghana using whole-genome sequencing. Most of the *Salmonella* serovars (Fresno, Plymouth, Infantis, Give and Orleans) identified in this study are yet to be reported in Ghana. Most *Salmonella* isolates were pan-sensitive, but genes conferring resistance to fosfomycin (*fosA7.2*) and tetracycline (*tet (A)*) were detected in one and three isolates, respectively. Seven of the *Salmonella* isolates carried the Inc11-I(Gamma) plasmid replicon. Although antimicrobial resistance was not common among *Salmonella* strains, most (11/19) of the *E. coli* strains had at least one resistance gene, with nearly half (8/19) being multidrug resistant and carried plasmids. Three of the 19 *E. coli* strains belonged to serovars commonly associated with enteroaggregative *E. coli* (EAEC) pathotype. While strains belonging to virulence-associated lineages lacked key plasmid-encoded virulence plasmids, several plasmid replicons were detected in most of the *E. coli* (14/19) strains. Food contaminated with these pathogens can serve as a vehicle for disease transmission, posing a significant public health risk and necessitating stringent food safety and hygiene practices to prevent outbreaks. Hence, there is need for continuous surveillance and preventive measures to stop the spread of foodborne pathogens and reduce the risk of associated illnesses in Ghana.

retrieval, a full listing of the specific sequences is included in [S1 Table](#).

**Funding:** Whole genome sequencing and analysis for this project was supported through SEQAFRICA, a regional award funded by the Department of Health and Social Care's Fleming Fund using UK aid. INO is a Calestous Juma Fellow supported by the Bill and Melinda Gates Foundation (INV-036234). The views expressed in this publication are those of the authors and not necessarily those of the Bill and Melinda Gates Foundation, the UK Department of Health and Social Care or its Management Agent, Mott MacDonald. The funders had no role in study design, data collection and analysis, decision to publish, or preparation of the manuscript.

**Competing interests:** The authors have declared that no competing interests exist.

## Introduction

Milk and meat are essential protein sources that constitute a significant and nutrient-rich component of human diets. However, their consumption is often associated with foodborne infections [1], particularly those caused by *Salmonella* and *Escherichia coli* [2–5]. Salmonellosis is under-reported in Ghana, and only a few studies have investigated the plausible role of contaminated milk [6], meat, meat products, handlers' hands and associated surfaces such as knives, tables and aprons [7–9] in facilitating their transmission. Knowledge of food safety practices by key food handlers in Ghana has recently been reported to be suboptimal, as have food safety infrastructure and regulatory enforcement [10, 11]. There have been a few reports of meat samples contaminated with *E. coli* in Ghana [11–14]. Similarly, *E. coli* has been recovered from milk, milking utensils, faeces of lactating cow and milkers' hands [15]. Some of these *E. coli* strains harbour both virulence and antimicrobial resistance genes (ARGs), raising public health concerns. However, few of these strains have been thoroughly characterized.

There are public health and food safety implications of finding *Salmonella* and *E. coli* in food because they are invariably of faecal origin. Globally, in addition to contamination risks, *Salmonella* and *E. coli* sourced from milk and meat increasingly exhibit resistance to different classes of antibiotics that is commonly mediated by mobile elements [13, 16–18]. The prevalence of multidrug-resistant (MDR) *Salmonella* and *E. coli* is also on the rise in clinical infections [19, 20]. Notably, resistance to extended spectrum beta-lactams, trimethoprim/sulfamethoxazole, chloramphenicol and ciprofloxacin has been reported, often associated with plasmids that could mediate their spread, in both *Salmonella* and *E. coli* isolates from milk and retail meats in Ghana [6, 12, 14].

Various methods, including serotyping, antibiotic profiling, pulsed-field gel electrophoresis and whole genome sequencing, have been employed to elucidate the phenotypic and genotypic attributes of foodborne pathogens and to determine their interrelationships and connections to pandemic clones of interest [13, 21]. Next-generation sequencing (NGS) technology, the most versatile and informative approach, has gained recent prominence [22, 23]. NGS is now used by PulseNet to categorize foodborne diseases, enabling nuanced epidemiological investigations [24]. Identification of virulence factors, antibiotic resistance genes, and serotypes are all possible by genomic analysis, which can also provide enhanced information on strain inter-relatedness, and therefore enable source attribution. Data on the genomic characterization of *Salmonella* and *E. coli* from milk and meat are few from low- and middle-income countries, including Ghana [7, 25]. In light of this gap, this study aims to characterize the resistance, virulence and plasmid profile of previously isolated *Salmonella* and *E. coli* isolated from fresh different retail meats, milk, and associated samples (handler's hand swab, table, knife and faecal samples) in Saboba district and Bolgatanga Municipality of Ghana.

## Methods

### Strains

A total of 33 bacterial isolates (14 *Salmonella* and 19 *E. coli* species) previously isolated from various fresh and ready-to-eat meats, meat sellers' tables, milk, milk-collecting utensils, milkers' hands and faeces of lactating cows were characterized for this study ([Table 1](#)) [8, 15, 26, 27]. The isolates originated from markets and farms in Bolgatanga Municipality and Saboba District in Northern Ghana and were cryopreserved in 50% glycerol in Luria broth at -80°C.

### Ethical considerations

All isolates were recovered in earlier studies from vended food or at informal food vending premises, including milk cow droppings [8, 15, 26, 27]. Study design and sampling was

Table 1. *E. coli* and *Salmonella* isolates characterized in this study.

| Id             | Code       | Collection date | Species                    | Sample                        | Ref-erence |
|----------------|------------|-----------------|----------------------------|-------------------------------|------------|
| GH-FA-M23_S31  | M2 3       | 2/10/2020       | <i>Salmonella enterica</i> | Milk                          | [27]       |
| GH-FA-M87_S6   | M8 1       | 2/10/2020       | <i>Salmonella enterica</i> | Milk                          | [27]       |
| GH-FA-FS24_S23 | FS24       | 2/10/2020       | <i>Salmonella enterica</i> | Faecal sample (Milking cow)   | [27]       |
| GH-FA-M25_S2   | M25        | 2/10/2020       | <i>Salmonella enterica</i> | Milk                          | [27]       |
| GH-FA-US15_S32 | US15-2     | 22/10/2020      | <i>Salmonella enterica</i> | Utensil sample                | [27]       |
| GH-FA-FK4_S10  | FK4        | 22/10/2020      | <i>Salmonella enterica</i> | Knife (Fresh meat)            | [8]        |
| GH-FA-FK4d_S7  | FK4d       | 22/10/2020      | <i>Salmonella enterica</i> | Knife (Fresh meat)            | [8]        |
| GH-FA-RCH2_S11 | Rch2 extra | 22/10/2020      | <i>Salmonella enterica</i> | RTE Chicken                   | [8]        |
| GH-FA-RG2_S29  | RG2        | 22/10/2020      | <i>Salmonella enterica</i> | RTE Guinea fowl               | [8]        |
| GH-FA-RK4_S19  | RK4        | 2/10/2020       | <i>Salmonella enterica</i> | Knife (RTE utensil)           | [8]        |
| GH-FA-RM4_S20  | RM4        | 2/10/2020       | <i>Salmonella enterica</i> | RTE Mutton                    | [8]        |
| GH-FA-RP5_S5   | RP5        | 12/10/2020      | <i>Salmonella enterica</i> | RTE Pork                      | [8]        |
| GH-FA-RP5D_S11 | RP5D       | 12/10/2020      | <i>Salmonella enterica</i> | RTE Pork                      | [8]        |
| GH-FA-RPSD_S30 | RPSD       | 12/10/2020      | <i>Salmonella enterica</i> | RTE Pork                      | [8]        |
| GH-FA-FS23_S22 | FS23       | 22/10/2020      | <i>Escherichia coli</i>    | Faecal sample (milking cow)   | [27]       |
| GH-FA-US24_S14 | US24       | 22/10/2020      | <i>Escherichia coli</i>    | Utensil Sample                | [15]       |
| GH-FA-HS11_S26 | HS11       | 22/10/2020      | <i>Escherichia coli</i>    | Hand swab                     | [15]       |
| GH-FA-HS3_S27  | HS3        | 2/10/2020       | <i>Escherichia coli</i>    | Hand swab                     | [15]       |
| GH-FA-M9_S16   | M9         | 22/10/2020      | <i>Escherichia coli</i>    | Milk                          | [15]       |
| GH-FA-US3_S21  | US3        | 2/10/2020       | <i>Escherichia coli</i>    | Utensil sample                | [15]       |
| GH-FA-HS12_S21 | HS12       | 2/10/2020       | <i>Escherichia coli</i>    | Hand Swab                     | [15]       |
| GH-FA-M25D_S22 | M25        | 2/10/2020       | <i>Escherichia coli</i>    | Milk                          | [15]       |
| GH-FA-FB4_S24  | FB4        | 22/10/2020      | <i>Escherichia coli</i>    | Fresh Beef                    | [26]       |
| GH-FA-FC1_S23  | FC1        | 2/10/2020       | <i>Escherichia coli</i>    | Fresh Chicken                 | [26]       |
| GH-FA-FH2_S15  | FH2        | 22/10/2020      | <i>Escherichia coli</i>    | Hand Swab (Fresh meat vendor) | [26]       |
| GH-FA-FG5_S16  | FG5        | 22/10/2020      | <i>Escherichia coli</i>    | Fresh Guinea fowl             | [26]       |
| GH-FA-FM4_S34  | FM4        | 12/10/2020      | <i>Escherichia coli</i>    | Fresh Mutton                  | [26]       |
| GH-FA-FT1_S17  | FT1        | 12/10/2020      | <i>Escherichia coli</i>    | Table swab (Fresh meat)       | [26]       |
| GH-FA-RB4_S24  | RB4        | 12/10/2020      | <i>Escherichia coli</i>    | RTE Beef                      | [26]       |
| GH-FA-RH4_S3   | RH4        | 12/10/2020      | <i>Escherichia coli</i>    | Hand swab (RTE meat Vendor)   | [26]       |
| GH-FA-RT3_S6   | RT3        | 12/10/2020      | <i>Escherichia coli</i>    | Table swab (RTE meat)         | [26]       |
| GH-FA-RT3_S29  | RT3d       | 12/10/2020      | <i>Escherichia coli</i>    | Table swab (RTE meat)         | [26]       |
| GH-FA-RCLI_S18 | Rch1       | 12/10/2020      | <i>Escherichia coli</i>    | RTE Chevron                   | [26]       |

Key: RTE: Ready-to-eat–meats sampled in prepared form

<https://doi.org/10.1371/journal.pone.0315583.t001>

approved by the Department of Veterinary Science, UDS. No other permissions were obtained or deemed necessary by the department. No humans or animals were use in the research and therefore ethical approval was deemed not required.

### ***Salmonella* and *E. coli* identification**

*Salmonella* isolates were initially confirmed using a latex agglutination kit for *Salmonella* (Oxoid Limited, Basingstoke, UK) and by PCR targeting the *invA* gene as described by Rahn et al. (1992) [28], using PCR oligonucleotides *invA139f* GTGAAATTATCGCCACGTTTCGGGCAA and *invA141r* TCATCGCACCGTCAAGGAACC. PCR was performed using PuRe Taq Ready-To-Go PCR Beads (illustra™). The PCR cycle used an initial denaturation temperature of 95°C for two minutes, followed by 35 cycles of denaturation at 95°C for 30 seconds, annealing

at 55°C for 30 seconds and extension at 72°C for two minutes, then a terminal extension at 72°C for five minutes. Visualization of the 284 bp amplicon was accomplished after electrophoresis on 1.5% (w/v) agarose gels stained with Gel red (biotium), using a UVP GelMax transilluminator and imager. *Salmonella* isolates positive for *invA* and *E. coli* isolates were biotyped with the Gram-negative (GN) test kit (Ref: 21341) on VITEK 2 systems (version 2.0, Marcy-l'Etoile, France, Biomérieux) according to manufacturer's instructions

### DNA extraction, library preparation and whole genome sequencing

Genomic DNA of the isolates was extracted using Wizard DNA extraction kit (Promega; Wisconsin, USA) in accordance with manufacturer's protocol. Using a dsDNA Broad Range quantification assay, the extracted DNA was quantified on a Qubit fluorometer (Invitrogen; California, USA). dsDNA libraries were prepared using NEBNext Ultra II FS DNA library kit for Illumina with 96-unique indexes (New England Biolabs, Massachusetts, USA; Cat. No: E6609L). DNA libraries was quantified using dsDNA High Sensitivity quantification assay on a Qubit fluorometer (Invitrogen; California, USA) and fragment length analysed with the Bioanalyzer (Agilent). Denatured libraries were sequenced on an Illumina MiSeq (Illumina, California, USA). The raw sequence reads were *de novo* assembled using SPAdes v3.15.3 [29] according to GHRU protocols (<https://gitlab.com/cgps/ghru/pipelines/dsl2/pipelines/assembly>).

### Sequence typing of *Salmonella* and *E. coli* genomes

Sequence reads were deposited in the *Salmonella* and *E. coli* database for *Salmonella* and *E. coli* respectively on Enterobase [30] and analyzed using publicly available tools that we have previously validated [31, 32]. Multi-locus sequence types (MLST) for the isolates were determined using ARIBA [33]. Novel ST strains were assigned ST using Enterobase [30]. The *Salmonella* genome assemblies were analysed using the *Salmonella* In-Silico Typing Resource (SISTR) for the prediction of serovars and serogroups [34] ([https://github.com/phac-nml/sistr\\_cmd](https://github.com/phac-nml/sistr_cmd)), while the serotyping of the *E. coli* genome was done using ECtyper [35].

### Identification of AMR, plasmids and virulence genes

PlasmidFinder [36] was utilized to identify plasmid replicons that were present in the assembled genomes. AMRFinderPlus v3.10.24 [37] and its associated database (version 2022-04-04.1) were used to predict the antimicrobial resistance genes carried by the isolates and the drug classes to which they probably conferred resistance. Using ARIBA [33] and the virulence factor database (VFDB, <http://www.mgc.ac.cn/VFs/>), we were also able to identify the virulence genes that were present in the isolates.

### Single Nucleotide Polymorphism (SNP) calling and phylogenetic analysis

For phylogenetic analysis, reference sequences for the *Salmonella* and *E. coli* genomes were objectively selected from the National Center for Biotechnology Information Reference Sequence (RefSeq) database (<https://www.ncbi.nlm.nih.gov/refseq/>) using BactinspectorMax v0.1.3 (<https://gitlab.com/antunderwood/bactinspector>). The selected references were the *S. enterica* subsp. *enterica* serovar Fresno strain (assembly accession: GCF\_003590695.1) and the *E. coli* O25b:H4-ST131 strain (assembly accession: GCF\_000285655.3). The sequence reads for each species were then mapped to the chromosome of the reference using BWA (v0.7.17) [38] and variants were called and filtered using bcftools (v1.9) [39] as implemented in the GHRU SNP phylogeny pipeline ([https://gitlab.com/cgps/ghru/pipelines/snp\\_phylogeny](https://gitlab.com/cgps/ghru/pipelines/snp_phylogeny)). Variant

positions were concatenated into a pseudoalignment and used to generate a maximum likelihood tree using iqtree (v1.6.8) [40]. SNP distances between the genome pairs were calculated using snp-dists v.0.8.2 (<https://github.com/tseemann/snp-dists>).

## Results

### *Salmonella* serotypes, sequence types (STs), virulence factors and phylogeny

We used SISTR software to predict the serovars of the 14 *Salmonella* strains characterized in this study from whole genome sequence reads, which are deposited in the European Nucleotide Archive with the study accession PRJEB58695 (S1 Table). The most common serotype was Fresno (n = 6) followed by Give (n = 3), Orleans (n = 2), Plymouth (n = 1), Agona (n = 1) and Infantis (n = 1). The *S. Fresno* and *S. Orleans* isolates were from previously unreported sequence types, now designated ST10742 and ST10465 respectively (S2 Table). As shown in Fig 1, all the isolates from ready-to-eat pork, mutton and chicken belonged to serovar Fresno. *S. Fresno* isolates were also isolated from a meat vendor's knife, as was *S. Orleans*. The three milk isolates, which were all from Saboba, belonged to the serovars Plymouth (ST565), Give (ST516) and Agona (ST13) (Fig 1). Two more ST516 *S. Give* isolates were recovered from the faeces of milking cow and from a milking utensil.

Phylogenetic analysis of the 14 *Salmonella* isolates from this study showed that all *S. Fresno* isolates, irrespective of source, clustered together and differed by < 3 SNPs. The two *S. Orleans* isolates were identical (0 SNPs) and the three *S. Give* isolates were also identical, with the isolates originating from milk, faeces of milking cow and from a milking utensil, also in Saboba.

All *Salmonella* isolates harboured *curli* (*csg*) genes as well as *bcf*, *fim* and *ste* fimbrial operations and ten of them, representing all serovars except *S. Give* and Plymouth, carried long polar fimbriae (*lpf*) genes. The *S. Infantis* and *S. Agona* strains carried *ratB* and *shdA*. Type III secretion system effector genes, such as: *inv*, *org*, *prg*, *sif*, *spa*, *sse*, *ssa* and *sop* were detected in all the

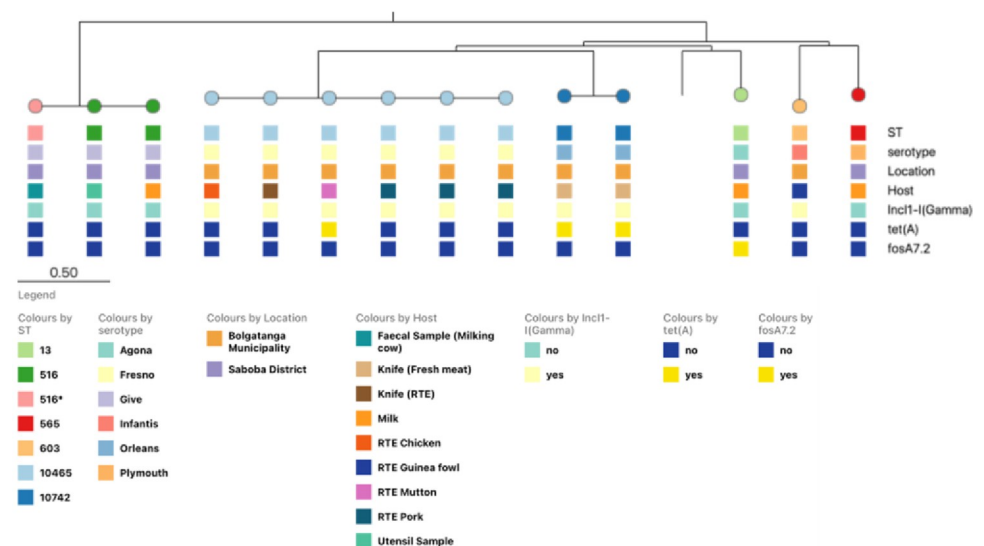

**Fig 1. Core genome SNP-based maximum likelihood tree showing phylogenetic relationships among strains sequenced in this study.** The matrix below the tree shows the sequence types, serotypes, location of isolation (Bolgatanga municipality or Saboba district) as well as the source/host sample and presence or absence of the IncI1-I (Gamma) plasmid replicon, *tetA* and *fosA* resistance genes.

<https://doi.org/10.1371/journal.pone.0315583.g001>



isolates while *avr* was present in 57.1% (8/14) of the isolates and only one isolate harboured *gogB*. Four of the isolates also encoded the cytolethal distending toxin gene, *cdtB* (S3 Table).

### Plasmid replicons and ARG profiles of *Salmonella*

The *Salmonella* isolates were largely pan-sensitive but genes conferring resistance to fosfomycin (*fosA7.2*) and tetracycline (*tet(A)*) were detected in one and three isolates respectively. Both *S. Orleans* isolates and one of the *S. Fresno*, from ready-to-eat mutton carried *tetA*, along with an IncI1-I(Gamma) plasmid replicon, which was also seen in six other *tetA*-negative strains. Interestingly, the IncI1-I(Gamma) plasmid replicon was detected in all isolates from Bolgatanga municipality, irrespective of serovar, and no isolate from Saboba district harboured this plasmid. The fosfomycin resistance gene was found in the *S. Agona* genome, in which no plasmid replicons were detected (Fig 1).

### *E. coli* serotypes, sequence types (STs), virulence factors and phylogeny

A total of 19 *E. coli* isolates were identified. *E. coli* serotyping using the ECtyper revealed that the most common serotypes among the *E. coli* isolates were O:H7 (n = 2), O138:H48 (n = 2), O6:H16 (n = 2), and O8/O160:H16 (n = 2). A number of these serovars and STs are associated with pathogenicity, notably O6:H16 [41], as well as O8/O160:H16 and O77/O17/O44/O106/O73:H18 (ST394; [42–44]). The strains belonging to these lineages lacked the defining virulence genes of the respective pathotypes but did contain accessory virulence genes, as shown in S4 Table.

Irrespective of whether they belonged to a lineage commonly associated with virulence, most of the isolates contained a range of adhesins and iron utilization genes. *E. coli* extracellular protein (ECP) export pathway (*ecp/yag*) and *ompA* and type I fimbriae-encoding operon, *fim*, encoding genes seen in most *E. coli* genomes, were present in 94.7% (18/19) of *E. coli* isolates. Fimbriae encoding gene, *f17d*, often seen in enterotoxigenic *E. coli* recovered from animals, was present in the two O8/O160:H16 isolates and an O:H7 isolate.

The phylogenetic analysis of the 19 *E. coli* isolates from this study and a reference genome (NZ\_HG941718.1) based on SNP is presented in Fig 2. The range of isolates was broader than with *Salmonella* but closely related pairs of isolates belonging to the same serovar, and ST were found in three instances. Very similar (2347 SNPs) O6:H16 isolates were recovered from different food preparation table samples in Bolgatanga. One of the two isolates from milk in Saboba belonged to ST2165 and was identical (0 SNPs) to a Saboba ST2165 utensil isolate. The two ST4 isolates from fresh beef and a cow milker's hand differed by 2347 SNPs and are unlikely to be connected.

### Plasmid replicons and ARG profiles of *E. coli*

Antimicrobial resistance determinants present in the *E. coli* isolates include those encoding resistance to aminoglycosides (*aph(3'')-Ib*, *aph(6)-Id*, *aph(6)-Id*, *aph(3'')-Ib*), beta-lactams (*bla<sub>LAP-2</sub>*, *bla<sub>TEM-1</sub>*), fosfomycin (*fosA7.5*), quinolones (*qnrB19*, *qnrS1*), sulfonamide (*sul2*), tetracycline (*tet(A)*, *tet(B)*) and trimethoprim (*dfrA14*) (Fig 2). At least 3 antimicrobial resistance genes (ARGs) which confer resistance to different classes of antibiotics were present in 8 isolates. Three isolates carried one ARG each while 8 isolates had no ARGs. Six strains carried the genes *aph(3'')-Ib*, *aph(6)-Id*, *bla<sub>TEM-1</sub>*, *dfrA14*, *sul2*, *qnrS1* and *tet(A)*. The *dfrA14-qnrS1-tet(A)* resistance gene combination has previously been reported from Nigeria, being part of a transposon transmitted in an IncX plasmid [45]. In this study however, IncX replicons were not detected. The most common plasmid replicon type detected among the *E. coli* isolates was pO111 (n = 6), originally described in an *E. coli* virulence plasmid and found in the

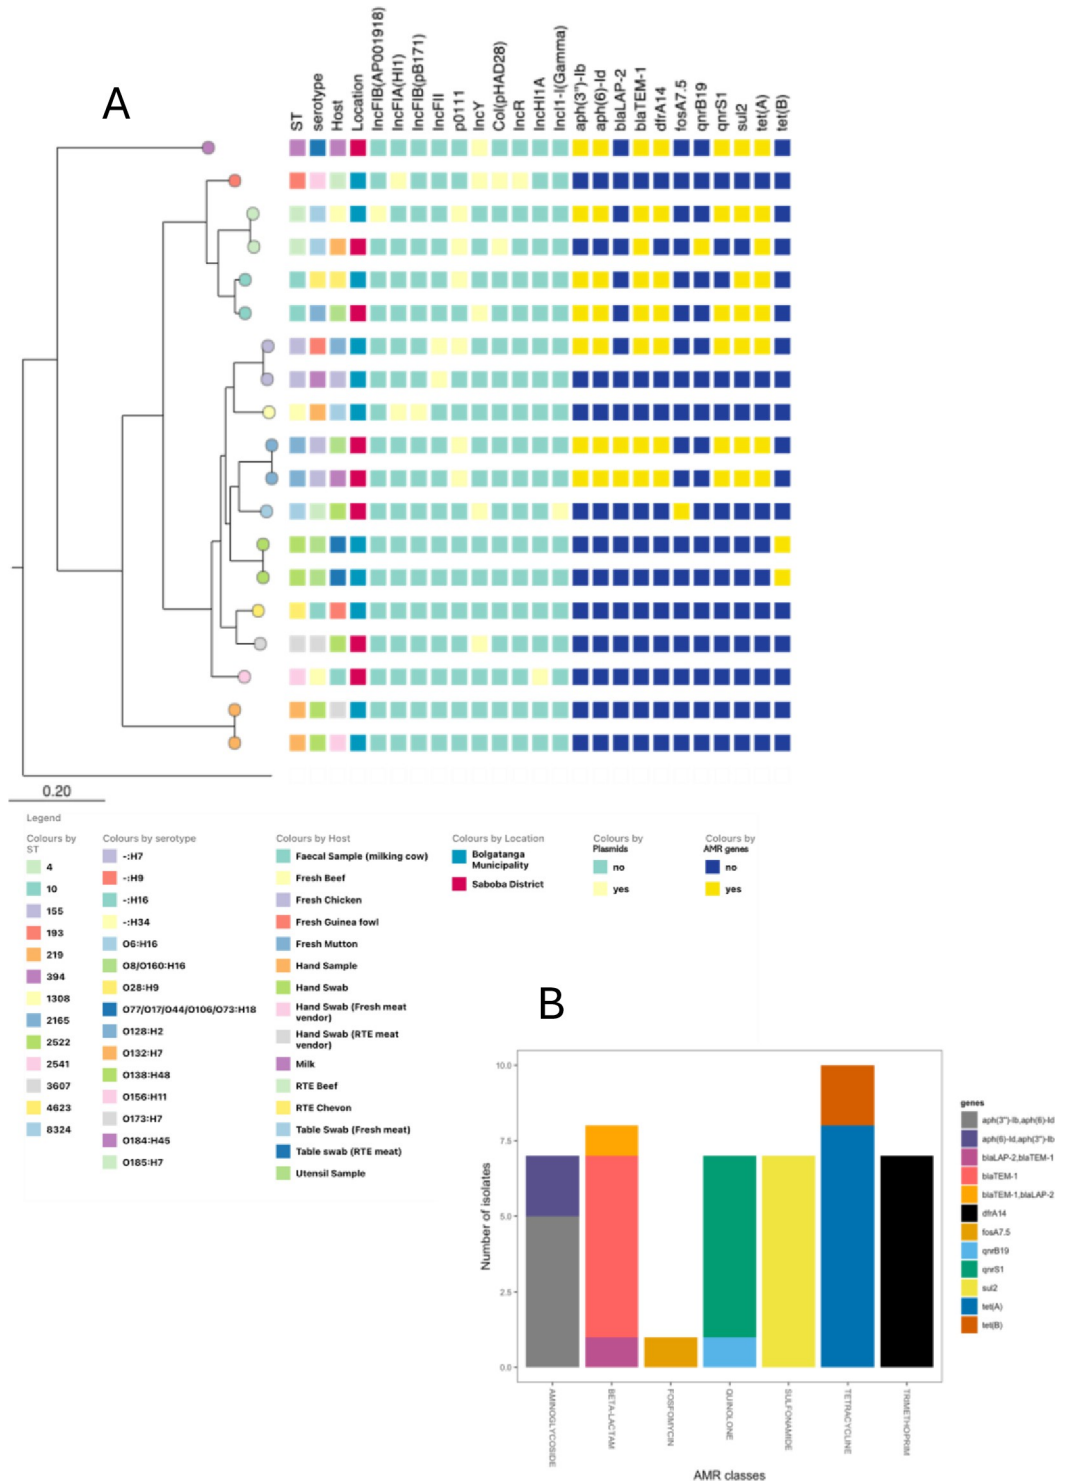

**Fig 2. Phylogeny, plasmid replicons and resistance genes of *E. coli* isolates.** (a). SNP-based phylogenetic tree of the *E. coli* isolates showing the range of sequence types, serovars, plasmid replicons and resistance genes detected (b) AMR determinants detected in *E. coli* and the resistance they confer.

<https://doi.org/10.1371/journal.pone.0315583.g002>

aforementioned strains belonging to virulence-associated lineages. The other plasmid replicon types detected were IncY (n = 5), IncFII (n = 2), IncFIA(HI1) (n = 2), Col(pHAD28) (n = 2), IncFIB(pB171) (n = 1), IncR (n = 1), IncHI1A (n = 1) and IncI1-I(Gamma), which was common among the *Salmonella*, (n = 1) (Fig 2). All multidrug resistant *E. coli* strains in this study encode pO111 or IncY replicons.

## Discussion

*Salmonella* and *E. coli* are the main causes of bacterial foodborne illnesses in Ghana [46]. Retail meat, along with milk and their products are recognized as primary sources of foodborne Salmonellosis [12] and *E. coli* infection [7]. Post-cooking handling practices, exposure during the points of sale, and suboptimal meat storage conditions collectively contribute to an increased presence of both pathogenic and spoilage bacteria in ready-to-eat (RTE) meat [47]. Within Ghana, food safety has been inadequately studied in the northern region [10]. In this study, we characterized the genomes of 14 *Salmonella* and 19 *E. coli* previously isolated from Saboba district and Bolgatanga Municipality in northern Ghana.

The *Salmonella* serovars (Fresno, Plymouth, Infantis, Give and Orleans) identified in this study are yet to be reported in Ghana, but Guinee et al. (1961) [48] isolated *S. Agona* from cattle in Ghana and *S. Give* (but ST524, different from ST516 in this study) has been reported from beef in Nigeria [49]. Isolation of *S. Infantis* from retail poultry meat has also been reported in Ecuador [50], Belgium [51] and Italy [52] and all the serovars detected in this study have been implicated in human infections. The identification of *Salmonella* serovars not previously documented in the country in meat and milk products highlights the need for heightened surveillance and preventive measures to curb the spread of foodborne pathogens and reduce the risk of associated illnesses.

Unlike *Salmonella*, not all *E. coli* are potential pathogens. However, *E. coli* serve as markers for faecal contamination and therefore the potential that other pathogens are present. The predominant *E. coli* STs (ST4, ST10, ST219, ST2522) detected in our study have been previously isolated from food animals and have been associated with pathogenicity [53–55].

While none of the *E. coli* isolates carried genes encoding ETEC heat-sensitive or heat-labile enterotoxins, f17d fimbrial genes present in four of the *E. coli* genomes encode ETEC colonization factors commonly associated with colonization of cattle and other ruminant isolates [56]. *E. coli*, F17 fimbriae are associated with pathogenic *E. coli* recovered from diarrhoea and septicaemia outbreaks in calves, lambs, and humans, including from outbreaks.

Additionally, two of the ST4 *E. coli* isolates from this study not harbouring f17d fimbrial genes belong to the serovar O6:H16, one of the most widely disseminated lineages of human enterotoxigenic *E. coli* (ETEC). O6:H16 ETEC cause outbreaks, often associated with food and/or inadequate handwashing [57–59]. ETEC, by definition, produce plasmid-encoded heat-labile and/or heat stable toxins not present in the genomes of the isolates from this study.

However, the serovars O8/O160:H16 and O77/O17/O44/O106/O73:H18 belong to a previously described enteroaggregative *E. coli* (EAEC) lineage [42, 44]. Isolates from this study belonging to the serovars O8/O160:H16 and O77/O17/O44/O106/O73:H18 possessed no EAEC accessory genes. These strains are from virulent lineages but lack key virulence genes that are plasmid-encoded, which could mean that these plasmids were lost in the food chain or during isolation but could be reacquired. Nevertheless, the presence of these strains in food could increase the risk of foodborne illness.

While strains belonging to virulence-associated lineages lacked key plasmid-encoded virulence plasmids, several plasmid replicons were detected in the isolate genomes. According to McMillan et al. (2019) [60], plasmid replicons ColE, IncI1, IncF, and IncX were commonly



detected in *Salmonella* from food animals in the US. In this study, the IncI1 replicon was predominant, with nine of the thirteen *Salmonella* strains harbouring IncI1 plasmid replicon, of which three harboured the *tetA* gene. This is likely to be an instance of a successful mobile element with extraordinary local reach, a few of which have been reported from West Africa, including Ghana, in the past [45, 61–63]. The IncI1-I(Gamma) plasmid replicon observed among *Salmonella* isolates was detected in all *Salmonella* isolates from Bolgatanga municipality—three different serovars—and none of the Saboba district isolates. However, one *E. coli* isolate (from a recently reported ST, ST8274) from Saboba did have this replicon. As it is an IncI1 plasmid replicon, its plasmid should be better characterized and, it should remain under surveillance because numerous articles have reported association of the IncI1 plasmid replicon with multiple ARGs, such as *tetB*, *tetAR*, *bla<sub>CMY-2</sub>*, *bla<sub>TEM-1</sub>*, *aac3VIa*, *aphA*, *aadA* and *sulI* [60], *bla<sub>CTXM-1</sub>* [64], *strA*, *strB*, *cmlA*, *floR*, *bla<sub>SHV-12</sub>*, *bla<sub>OXA-2</sub>* and *FosA3* [65] in IncI1 plasmids in *Salmonella*. As our own sequence was generated by short read only, the first step would be to generate long read sequence that could fully assemble the plasmid and make it possible to identify genetic factors supporting its success.

Among the *E. coli* isolates, the plasmid replicons pO111 was the most common replicon. A previous study by Balbuena-Alonso et al. (2022) [66], revealed that pO111 is usually associated with extended spectrum beta lactamases gene and is very common in food and clinical isolates. In this study, all isolates carrying pO111 harbour at least one beta-lactamase gene. Likewise, all the pO111 plasmid bearing isolates in this study carried ARGs that confer resistance to at least 4 classes of antibiotics. Altogether, these data demonstrate a concerning reservoir of resistance genes in these foodborne bacteria.

## Conclusion

This study has characterized the genomes of *Salmonella* and *E. coli* in milk, meat and their associated utensils. The diverse serovars and virulence genes detected in *Salmonella* strains indicate potential pathogenicity. Although not all *E. coli* strains are pathogenic, their presence serves as an indicator of faecal contamination, suggesting the potential presence of other harmful pathogens. The presence of EAEC strains in food is concerning as EAEC is a well-known cause of diarrhoeal diseases, particularly in children and immunocompromised individuals, making its presence in food a serious concern. While antimicrobial resistance was not common among *Salmonella* strains, most of the *E. coli* strain had at least one resistance gene, and almost half were multidrug resistant and carried mobile elements. Moreover, there have been recent reports of resistant *Salmonella* and *E. coli* from meat and milk elsewhere in West Africa [49].

A recent scoping review reported weak enforcement of food safety regulations, as well as a lack of infrastructure, knowledge and skills to implement these regulations [10, 11, 46]. Food contaminated with and *Salmonella* and *E. coli* can serve as a vehicle for their transmission, posing a significant public health risk. We recommend that food safety regulations be strengthened in northern Ghana and, by extension, West Africa. It is also important to increase awareness among consumers so that food is handled in such a way to prevent pathogen transmission. There is an additional need for continuous surveillance and preventive measures to stop the spread of foodborne pathogens and reduce the risk of associated illnesses in Ghana.

## Supporting information

**S1 Table. Accession numbers for genomes generated in this study.**  
(XLSX)

**S2 Table. Novel *Salmonella* allelic profile and assigned ST.**  
(XLSX)

**S3 Table. *Salmonella* strain metadata including serotype, ST, plasmid replicon, AMR and virulence profile.**  
(XLSX)

**S4 Table. *E. coli* strain metadata including serotype, ST, plasmid replicon, AMR and virulence profile.**  
(XLSX)

## Acknowledgments

We thank Ayorinde Afolayan, Faith I. Oni, and Abeeb Adeniyi for technical assistance and Jola-Ade Ajiboye, Kesiena Akpede and Pernille Nilsson for logistic support.

## Author Contributions

**Conceptualization:** Frederick Adzitey, Iruka N. Okeke.

**Data curation:** Gabriel Temitope Sunmonu, Frederick Adzitey, Erkison Ewomazino Odih, Anderson O. Oaikhena, Olabisi C. Akinlabi, Iruka N. Okeke.

**Formal analysis:** Gabriel Temitope Sunmonu, Erkison Ewomazino Odih, Olabisi C. Akinlabi.

**Funding acquisition:** Iruka N. Okeke.

**Investigation:** Gabriel Temitope Sunmonu, Erkison Ewomazino Odih, Boniface Awini Tibile, Rejoice Ekli, Martin Aduah, Anderson O. Oaikhena, Olabisi C. Akinlabi.

**Methodology:** Erkison Ewomazino Odih, Anderson O. Oaikhena, Iruka N. Okeke.

**Project administration:** Anderson O. Oaikhena, Iruka N. Okeke.

**Resources:** Iruka N. Okeke.

**Supervision:** Frederick Adzitey, Anderson O. Oaikhena, Akebe Luther King Abia, Daniel Gyamfi Amoako, Iruka N. Okeke.

**Validation:** Erkison Ewomazino Odih, Anderson O. Oaikhena, Iruka N. Okeke.

**Visualization:** Gabriel Temitope Sunmonu, Erkison Ewomazino Odih.

**Writing – original draft:** Gabriel Temitope Sunmonu, Erkison Ewomazino Odih, Iruka N. Okeke.

**Writing – review & editing:** Gabriel Temitope Sunmonu, Frederick Adzitey, Erkison Ewomazino Odih, Boniface Awini Tibile, Rejoice Ekli, Martin Aduah, Anderson O. Oaikhena, Olabisi C. Akinlabi, Akebe Luther King Abia, Daniel Gyamfi Amoako, Iruka N. Okeke.

## References

1. Grace D, Wu F, Havelaar AH. MILK Symposium review: Foodborne diseases from milk and milk products in developing countries-Review of causes and health and economic implications. *J Dairy Sci.* 2020; 103(11):9715–29. <https://doi.org/10.3168/jds.2020-18323> PMID: 33076183
2. Abraham S, O'Dea M, Sahibzada S, Hewson K, Pavic A, Veltman T, et al. *Escherichia coli* and *Salmonella* spp. isolated from Australian meat chickens remain susceptible to critically important antimicrobial agents. *PLoS One.* 2019; 14(10):e0224281. <https://doi.org/10.1371/journal.pone.0224281> PMID: 31644602

3. Elzhraa F, Al-Ashmawy M, El-Sherbini M, Abdelkhalek A. Critical occurrence of verotoxigenic *E. coli* and non-typhoidal salmonella in some heat treated dairy products. *Ital J Food Saf.* 2021; 10(2):9318. <https://doi.org/10.4081/ijfs.2021.9318> PMID: 34268144
4. Gutema FD, Abdi RD, Agga GE, Firew S, Rasschaert G, Mattheus W, et al. Assessment of beef carcass contamination with *Salmonella* and *E. coli* O 157 in slaughterhouses in Bishoftu, Ethiopia. *International Journal of Food Contamination.* 2021; 8:1–9.
5. Lay KK, Jeamsripong S, Sunn KP, Angkititrakul S, Prathan R, Srisanga S, et al. Colistin Resistance and ESBL Production in *Salmonella* and *Escherichia coli* from Pigs and Pork in the Thailand, Cambodia, Lao PDR, and Myanmar Border Area. *Antibiotics (Basel).* 2021; 10(6). <https://doi.org/10.3390/antibiotics10060657> PMID: 34072965
6. Parry-Hanson Kunadu A, Holmes M, Miller EL, Grant AJ. Microbiological quality and antimicrobial resistance characterization of *Salmonella* spp. in fresh milk value chains in Ghana. *Int J Food Microbiol.* 2018; 277:41–9. <https://doi.org/10.1016/j.ijfoodmicro.2018.04.025> PMID: 29680695
7. Adzitey F, Asante J, Kumalo HM, Khan RB, Somboro AM, Amoako DG. Genomic Investigation into the Virulome, Pathogenicity, Stress Response Factors, Clonal Lineages, and Phylogenetic Relationship of *Escherichia coli* Strains Isolated from Meat Sources in Ghana. *Genes (Basel).* 2020; 11(12). <https://doi.org/10.3390/genes11121504> PMID: 33327465
8. Aduah M, Adzitey F, Amoako DG, Abia ALK, Ekli R, Teye GA, et al. Not All Street Food Is Bad: Low Prevalence of Antibiotic-Resistant *Salmonella enterica* in Ready-to-Eat (RTE) Meats in Ghana Is Associated with Good Vendors' Knowledge of Meat Safety. *Foods.* 2021; 10(5). <https://doi.org/10.3390/foods10051011> PMID: 34066440
9. Tay MYF, Adzitey F, Sultan SA, Tati JM, Seow KLG, Schlundt J. Whole-Genome Sequencing of Nontyphoidal *Salmonella enterica* Isolates Obtained from Various Meat Types in Ghana. *Microbiol Resour Announc.* 2019; 8(15). <https://doi.org/10.1128/MRA.00033-19> PMID: 30975795
10. Botha NN, Ansah EW, Segbedzi CE, Darkwa S. Public health concerns for food contamination in Ghana: A scoping review. *PLoS One.* 2023; 18(8):e0288685. <https://doi.org/10.1371/journal.pone.0288685> PMID: 37561804
11. Asati DA, Abdulai PM, Boateng KS, Appau AAA, Ofori LA, Agyekum TP. Food safety knowledge and practices among raw meat handlers and the microbial content of raw meat sold at Kumasi Abattoir Butchery Shops in Kumasi, Ghana. *BMC Public Health.* 2024; 24(1):975. <https://doi.org/10.1186/s12889-024-18514-w> PMID: 38584288
12. Adzitey F, Assoah-Peprah P, Teye GA. Whole-genome sequencing of *Escherichia coli* isolated from contaminated meat samples collected from the Northern Region of Ghana reveals the presence of multiple antimicrobial resistance genes. *J Glob Antimicrob Resist.* 2019; 18:179–82. <https://doi.org/10.1016/j.jgar.2019.03.014> PMID: 30926467
13. Adzitey F, Teye GA, Amoako DG. Prevalence, phylogenomic insights, and phenotypic characterization of *Salmonella enterica* isolated from meats in the Tamale metropolis of Ghana. *Food Sci Nutr.* 2020; 8(7):3647–55. <https://doi.org/10.1002/fsn3.1647> PMID: 32724627
14. Falgenhauer L, Imirzalioglu C, Oppong K, Akenten CW, Hogan B, Krumkamp R, et al. Detection and Characterization of ESBL-Producing *Escherichia coli* From Humans and Poultry in Ghana. *Front Microbiol.* 2018; 9:3358. <https://doi.org/10.3389/fmicb.2018.03358> PMID: 30697208
15. Adzitey F, Yussif S, Ayamga R, Zuberu S, Addy F, Adu-Bonsu G, et al. Antimicrobial Susceptibility and Molecular Characterization of *Escherichia coli* Recovered from Milk and Related Samples. *Microorganisms.* 2022; 10(7). <https://doi.org/10.3390/microorganisms10071335> PMID: 35889054
16. Moawad AA, Hotzel H, Awad O, Tomaso H, Neubauer H, Hafez HM, et al. Occurrence of *Salmonella enterica* and *Escherichia coli* in raw chicken and beef meat in northern Egypt and dissemination of their antibiotic resistance markers. *Gut Pathog.* 2017; 9:57. <https://doi.org/10.1186/s13099-017-0206-9> PMID: 29075329
17. Geletu US, Usmael MA, Ibrahim AM. Isolation, Identification, and Susceptibility Profile of *E. coli*, *Salmonella*, and *S. aureus* in Dairy Farm and Their Public Health Implication in Central Ethiopia. *Vet Med Int.* 2022; 2022:1887977. <https://doi.org/10.1155/2022/1887977> PMID: 35198138
18. Worku W, Desta M, Menjetta T. High prevalence and antimicrobial susceptibility pattern of salmonella species and extended-spectrum beta-lactamase producing *Escherichia coli* from raw cattle meat at butcher houses in Hawassa city, Sidama regional state, Ethiopia. *PLoS One.* 2022; 17(1):e0262308.
19. Lyu N, Feng Y, Pan Y, Huang H, Liu Y, Xue C, et al. Genomic Characterization of *Salmonella enterica* Isolates From Retail Meat in Beijing, China. *Front Microbiol.* 2021; 12:636332. <https://doi.org/10.3389/fmicb.2021.636332> PMID: 33897640
20. Zhan Z, Xu X, Gu Z, Meng J, Wufuer X, Wang M, et al. Molecular epidemiology and antimicrobial resistance of invasive non-typhoidal *Salmonella* in China, 2007–2016. *Infect Drug Resist.* 2019; 12:2885–97. <https://doi.org/10.2147/IDR.S210961> PMID: 31571942

21. Jaja IF, Bhembe NL, Green E, Oguttu J, Muchenje V. Molecular characterisation of antibiotic-resistant *Salmonella enterica* isolates recovered from meat in South Africa. *Acta Trop.* 2019; 190:129–36. <https://doi.org/10.1016/j.actatropica.2018.11.003> PMID: 30408462
22. Rantsiou K, Kathariou S, Winkler A, Skandamis P, Saint-Cyr MJ, Rouzeau-Szynalski K, et al. Next generation microbiological risk assessment: opportunities of whole genome sequencing (WGS) for food-borne pathogen surveillance, source tracking and risk assessment. *Int J Food Microbiol.* 2018; 287:3–9. <https://doi.org/10.1016/j.ijfoodmicro.2017.11.007> PMID: 29246458
23. Hilt EE, Ferrieri P. Next Generation and Other Sequencing Technologies in Diagnostic Microbiology and Infectious Diseases. *Genes (Basel).* 2022; 13(9). <https://doi.org/10.3390/genes13091566> PMID: 36140733
24. Nadon C, Van Walle I, Gerner-Smidt P, Campos J, Chinen I, Concepcion-Acevedo J, et al. PulseNet International: Vision for the implementation of whole genome sequencing (WGS) for global food-borne disease surveillance. *Euro Surveill.* 2017; 22(23). <https://doi.org/10.2807/1560-7917.ES.2017.22.23.30544> PMID: 28662764
25. Saba CK, Escudero JA, Herrera-Leon S, Porrero MC, Suarez M, Dominguez L, et al. First identification of *Salmonella Urbana* and *Salmonella Ouakam* in humans in Africa. *J Infect Dev Ctries.* 2013; 7(10):691–5. <https://doi.org/10.3855/jidc.3548> PMID: 24129620
26. Abass A, Adzitey F, Huda N. *Escherichia coli* of Ready-to-Eat (RTE) Meats Origin Showed Resistance to Antibiotics Used by Farmers. *Antibiotics (Basel).* 2020; 9(12). <https://doi.org/10.3390/antibiotics9120869> PMID: 33291648
27. Tibile AB. Incidence of *Salmonella enterica* and total bacterial count obtained from cow milk and its related samples from Saboba district: One health approach [A dissertation]: University for Development Studies, Ghana; 2022.
28. Rahn K, De Grandis SA, Clarke RC, McEwen SA, Galan JE, Ginocchio C, et al. Amplification of an *invA* gene sequence of *Salmonella typhimurium* by polymerase chain reaction as a specific method of detection of *Salmonella*. *Mol Cell Probes.* 1992; 6(4):271–9. [https://doi.org/10.1016/0890-8508\(92\)90002-f](https://doi.org/10.1016/0890-8508(92)90002-f) PMID: 1528198
29. Prjibelski A, Antipov D, Meleshko D, Lapidus A, Korobeynikov A. Using SPAdes De Novo Assembler. *Curr Protoc Bioinformatics.* 2020; 70(1):e102. <https://doi.org/10.1002/cpbi.102> PMID: 32559359
30. Zhou Z, Alikhan NF, Mohamed K, Fan Y, Agama Study G, Achtman M. The Enterobase user's guide, with case studies on *Salmonella* transmissions, *Yersinia pestis* phylogeny, and *Escherichia* core genomic diversity. *Genome Res.* 2020; 30(1):138–52. <https://doi.org/10.1101/gr.251678.119> PMID: 31809257
31. Ikhimiukor OO, Oaikheni AO, Afolayan AO, Fadeyi A, Kehinde A, Ogunleye VO, et al. Genomic characterization of invasive typhoidal and non-typhoidal *Salmonella* in southwestern Nigeria. *PLoS Negl Trop Dis.* 2022; 16(8):e0010716. <https://doi.org/10.1371/journal.pntd.0010716> PMID: 36026470
32. Akinlabi OC, Nwoko EQ, Dada RA, Ekpo S, Omotuyi A, Nwimo CC, et al. Epidemiology and Risk Factors for Diarrheagenic *Escherichia coli* Carriage among Children in Northern Ibadan, Nigeria. *Am J Trop Med Hyg.* 2023; 109(6):1223–32. <https://doi.org/10.4269/ajtmh.22-0618> PMID: 37903436
33. Hunt M, Mather AE, Sanchez-Buso L, Page AJ, Parkhill J, Keane JA, et al. ARIBA: rapid antimicrobial resistance genotyping directly from sequencing reads. *Microb Genom.* 2017; 3(10):e000131. <https://doi.org/10.1099/mgen.0.000131> PMID: 29177089
34. Yoshida CE, Kruczkiewicz P, Laing CR, Lingohr EJ, Gannon VP, Nash JH, et al. The *Salmonella* In Silico Typing Resource (SISTR): An Open Web-Accessible Tool for Rapidly Typing and Subtyping Draft *Salmonella* Genome Assemblies. *PLoS One.* 2016; 11(1):e0147101. <https://doi.org/10.1371/journal.pone.0147101> PMID: 26800248
35. Bessonov K, Laing C, Robertson J, Yong I, Ziebell K, Gannon VPJ, et al. ECTyper: in silico *Escherichia coli* serotype and species prediction from raw and assembled whole-genome sequence data. *Microb Genom.* 2021; 7(12). <https://doi.org/10.1099/mgen.0.000728> PMID: 34860150
36. Carattoli A, Zankari E, Garcia-Fernandez A, Voldby Larsen M, Lund O, Villa L, et al. In silico detection and typing of plasmids using PlasmidFinder and plasmid multilocus sequence typing. *Antimicrob Agents Chemother.* 2014; 58(7):3895–903. <https://doi.org/10.1128/AAC.02412-14> PMID: 24777092
37. Feldgarden M, Brover V, Gonzalez-Escalona N, Frye JG, Haendiges J, Haft DH, et al. AMRFinderPlus and the Reference Gene Catalog facilitate examination of the genomic links among antimicrobial resistance, stress response, and virulence. *Sci Rep.* 2021; 11(1):12728. <https://doi.org/10.1038/s41598-021-91456-0> PMID: 34135355
38. Li H, Durbin R. Fast and accurate short read alignment with Burrows-Wheeler transform. *Bioinformatics.* 2009; 25(14):1754–60. <https://doi.org/10.1093/bioinformatics/btp324> PMID: 19451168
39. Danecek P, Bonfield JK, Liddle J, Marshall J, Ohan V, Pollard MO, et al. Twelve years of SAMtools and BCFtools. *Gigascience.* 2021; 10(2). <https://doi.org/10.1093/gigascience/giab008> PMID: 33590861

40. Nguyen LT, Schmidt HA, von Haeseler A, Minh BQ. IQ-TREE: a fast and effective stochastic algorithm for estimating maximum-likelihood phylogenies. *Mol Biol Evol.* 2015; 32(1):268–74. <https://doi.org/10.1093/molbev/msu300> PMID: 25371430
41. Scotland SM, Gross RJ, Rowe B. Serotype-related enterotoxigenicity in *Escherichia coli* O6:H16 and O148:H28. *J Hyg (Lond).* 1977; 79(3):395–403. <https://doi.org/10.1017/s0022172400053249> PMID: 336791
42. Okeke IN, Wallace-Gadsden F, Simons HR, Matthews N, Labar AS, Hwang J, et al. Multi-locus sequence typing of enteroaggregative *Escherichia coli* isolates from Nigerian children uncovers multiple lineages. *PLoS One.* 2010; 5(11):e14093. <https://doi.org/10.1371/journal.pone.0014093> PMID: 21124856
43. Chattaway MA, Day M, Mtwale J, White E, Rogers J, Day M, et al. Clonality, virulence and antimicrobial resistance of enteroaggregative *Escherichia coli* from Mirzapur, Bangladesh. *J Med Microbiol.* 2017; 66(10):1429–35. <https://doi.org/10.1099/jmm.0.000594> PMID: 28945190
44. Chen Y, Chen X, Zheng S, Yu F, Kong H, Yang Q, et al. Serotypes, genotypes and antimicrobial resistance patterns of human diarrhoeagenic *Escherichia coli* isolates circulating in southeastern China. *Clin Microbiol Infect.* 2014; 20(1):52–8. <https://doi.org/10.1111/1469-0691.12188> PMID: 23521436
45. Sumrall ET, Gallo EB, Aboderin AO, Lamikanra A, Okeke IN. Dissemination of the transmissible quinolone-resistance gene *qnrS1* by *IncX* plasmids in Nigeria. *PLoS One.* 2014; 9(10):e110279. <https://doi.org/10.1371/journal.pone.0110279> PMID: 25340787
46. Christiana Cudjoe D, Balali GI, Titus OO, Osafo R, Taufiq M. Food Safety in Sub-Sahara Africa, An insight into Ghana and Nigeria. *Environ Health Insights.* 2022; 16:11786302221142484. <https://doi.org/10.1177/11786302221142484> PMID: 36530486
47. Henriques A, Fraqueza M. *Listeria monocytogenes* and ready-to-eat meat-based food products: Incidence and control. *Listeria monocytogenes: incidence, growth behavior and control.* 2015:71–103.
48. Guinee PA, Kampelmacher EH, Willems HM. Six new *Salmonella* types, isolated in Ghana (*S. volta*, *S. agona*, *S. wa*, *S. techimani*, *S. mampong* and *S. tafo*). *Antonie Van Leeuwenhoek.* 1961; 27:469–72. <https://doi.org/10.1007/BF02538474> PMID: 13902866
49. Aworh MK, Nilsson P, Egyir B, Owusu FA, Hendriksen RS. Rare serovars of non-typhoidal *Salmonella enterica* isolated from humans, beef cattle and abattoir environments in Nigeria. *PLoS One.* 2024; 19(1):e0296971. <https://doi.org/10.1371/journal.pone.0296971> PMID: 38252613
50. Mejia L, Vela G, Zapata S. High Occurrence of Multiresistant *Salmonella Infantis* in Retail Meat in Ecuador. *Foodborne Pathog Dis.* 2021; 18(1):41–8. <https://doi.org/10.1089/fpd.2020.2808> PMID: 32808817
51. Zeng H, De Reu K, Gabriel S, Mattheus W, De Zutter L, Rasschaert G. *Salmonella* prevalence and persistence in industrialized poultry slaughterhouses. *Poult Sci.* 2021; 100(4):100991. <https://doi.org/10.1016/j.psj.2021.01.014> PMID: 33610890
52. Casagrande Proietti P, Musa L, Stefanetti V, Orsini M, Toppi V, Branciarri R, et al. *mcr-1*-Mediated Colistin Resistance and Genomic Characterization of Antimicrobial Resistance in ESBL-Producing *Salmonella Infantis* Strains from a Broiler Meat Production Chain in Italy. *Antibiotics (Basel).* 2022; 11(6). <https://doi.org/10.3390/antibiotics11060728> PMID: 35740135
53. Araujo S, I ATS, Tacao M, Patinha C, Alves A, Henriques I. Characterization of antibiotic resistant and pathogenic *Escherichia coli* in irrigation water and vegetables in household farms. *Int J Food Microbiol.* 2017; 257:192–200. <https://doi.org/10.1016/j.ijfoodmicro.2017.06.020> PMID: 28668729
54. Silva A, Silva V, Pereira JE, Maltez L, Igrejas G, Valentao P, et al. Antimicrobial Resistance and Clonal Lineages of *Escherichia coli* from Food-Producing Animals. *Antibiotics (Basel).* 2023; 12(6). <https://doi.org/10.3390/antibiotics12061061> PMID: 37370379
55. Zhao X, Miao Y, Adam FEA, Zhao H, Zhou Z, Su M, et al. ESBLs-producing *Escherichia coli* from sheep-origin: Genome-wide virulence genes identification and in vivo virulence assessment in mice and *Galleria mellonella*. *Transbound Emerg Dis.* 2022; 69(6):3606–17. <https://doi.org/10.1111/tbed.14729> PMID: 36222239
56. Bihannic M, Ghanbarpour R, Auvray F, Cavalie L, Chatre P, Boury M, et al. Identification and detection of three new F17 fimbrial variants in *Escherichia coli* strains isolated from cattle. *Vet Res.* 2014; 45(1):76. <https://doi.org/10.1186/s13567-014-0076-9> PMID: 25106491
57. Pacheco AB, Soares KC, de Almeida DF, Viboud GI, Binsztein N, Ferreira LC. Clonal nature of enterotoxigenic *Escherichia coli* serotype O6:H16 revealed by randomly amplified polymorphic DNA analysis. *Journal of clinical microbiology.* 1998; 36(7):2099–102. <https://doi.org/10.1128/JCM.36.7.2099-2102.1998> PMID: 9650973
58. Beatty ME, Adcock PM, Smith SW, Quinlan K, Kamimoto LA, Rowe SY, et al. Epidemic diarrhea due to enterotoxigenic *Escherichia coli*. *Clin Infect Dis.* 2006; 42(3):329–34. <https://doi.org/10.1086/499246> PMID: 16392076



59. Willshaw GA, Cheasty T, Rowe B, Smith HR, Faithfull-Davies DN, Brooks TG. Isolation of enterotoxigenic *Escherichia coli* from British troops in Saudi Arabia. *Epidemiol Infect.* 1995; 115(3):455–63. <https://doi.org/10.1017/s0950268800058611> PMID: 8557077
60. McMillan EA, Gupta SK, Williams LE, Jove T, Hiott LM, Woodley TA, et al. Antimicrobial Resistance Genes, Cassettes, and Plasmids Present in *Salmonella enterica* Associated With United States Food Animals. *Front Microbiol.* 2019; 10:832. <https://doi.org/10.3389/fmicb.2019.00832> PMID: 31057528
61. Dekker D, Eibach D, Boahen KG, Akenten CW, Pfeifer Y, Zautner AE, et al. Fluoroquinolone-Resistant *Salmonella enterica*, *Campylobacter* spp., and *Arcobacter butzleri* from Local and Imported Poultry Meat in Kumasi, Ghana. *Foodborne Pathog Dis.* 2019; 16(5):352–8. <https://doi.org/10.1089/fpd.2018.2562> PMID: 30907631
62. Labar AS, Millman JS, Ruebush E, Opintan JA, Bishar RA, Aboderin AO, et al. Regional dissemination of a trimethoprim-resistance gene cassette via a successful transposable element. *PLoS One.* 2012; 7(5):e38142. <https://doi.org/10.1371/journal.pone.0038142> PMID: 22666464
63. Monarrez R, Braun M, Coburn-Flynn O, Botelho J, Odetoyin BW, Otero-Vera JI, et al. A large self-transmissible resistance plasmid from Nigeria contains genes that ameliorate a carrying cost. *Sci Rep.* 2019; 9(1):19624. <https://doi.org/10.1038/s41598-019-56064-z> PMID: 31873110
64. Abraham S, Kirkwood RN, Laird T, Saputra S, Mitchell T, Singh M, et al. Dissemination and persistence of extended-spectrum cephalosporin-resistance encoding IncI1-bla(CTXM-1) plasmid among *Escherichia coli* in pigs. *ISME J.* 2018; 12(10):2352–62. <https://doi.org/10.1038/s41396-018-0200-3> PMID: 29899511
65. Foley SL, Kaldhove PR, Ricke SC, Han J. Incompatibility Group I1 (IncI1) Plasmids: Their Genetics, Biology, and Public Health Relevance. *Microbiol Mol Biol Rev.* 2021; 85(2). <https://doi.org/10.1128/MMBR.00031-20> PMID: 33910982
66. Balbuena-Alonso MG, Cortes-Cortes G, Kim JW, Lozano-Zarain P, Camps M, Del Carmen Rocha-Garcia R. Genomic analysis of plasmid content in food isolates of *E. coli* strongly supports its role as a reservoir for the horizontal transfer of virulence and antibiotic resistance genes. *Plasmid.* 2022; 123–124:102650. <https://doi.org/10.1016/j.plasmid.2022.102650> PMID: 36130651
